# Supplementary material for: Determination of tetraiodo-l-thyronine in human serum by competitive indirect chemiluminescence immunoassay
Source: Royal Society of Chemistry journal article supplement (doi:10.1039/c6ay00666c), 2016-01-01
Supplement: c6ay00666c1.pdf [file c6ay00666c1.pdf]

**Table S1** CPS values of 16 blank standard samples with CLEIA method

| Sample number            | 1     | 2     | 3     | 4     | 5     | 6     | 7     | 8     | 9     | 10    | 11    | 12    | 13    | 14    | 15    | 16    |
|--------------------------|-------|-------|-------|-------|-------|-------|-------|-------|-------|-------|-------|-------|-------|-------|-------|-------|
| Luminous intensity (CPS) | 95270 | 94128 | 86722 | 94354 | 91415 | 85189 | 95189 | 93318 | 87687 | 89023 | 85083 | 81732 | 85607 | 86663 | 87842 | 90965 |

**Table S2** Significant difference among four mean coefficient of variations in Table 3 using Least Significant Difference (LSD) (Letter notation)

| Sample volume ( $\mu\text{L}$ ) | Mean relative difference CV% | Significance of difference |
|---------------------------------|------------------------------|----------------------------|
|                                 |                              | $\alpha=0.05$              |
| 35                              | 22.37%                       | a                          |
| 40                              | 19.14%                       | a                          |
| 20                              | 13.06%                       | ab                         |
| 30                              | 6.92%                        | b                          |
